# Supplementary figures and images for: Semantics of Dairy Fermented Foods: A Microbiologist’s Perspective
Source: MDPI journal article supplement (doi:10.3390/foods11131939), 2022-06-29

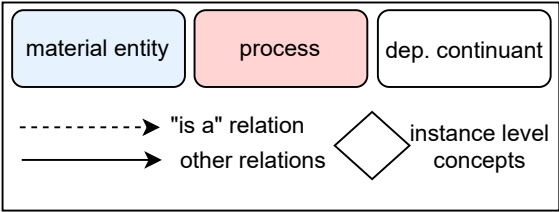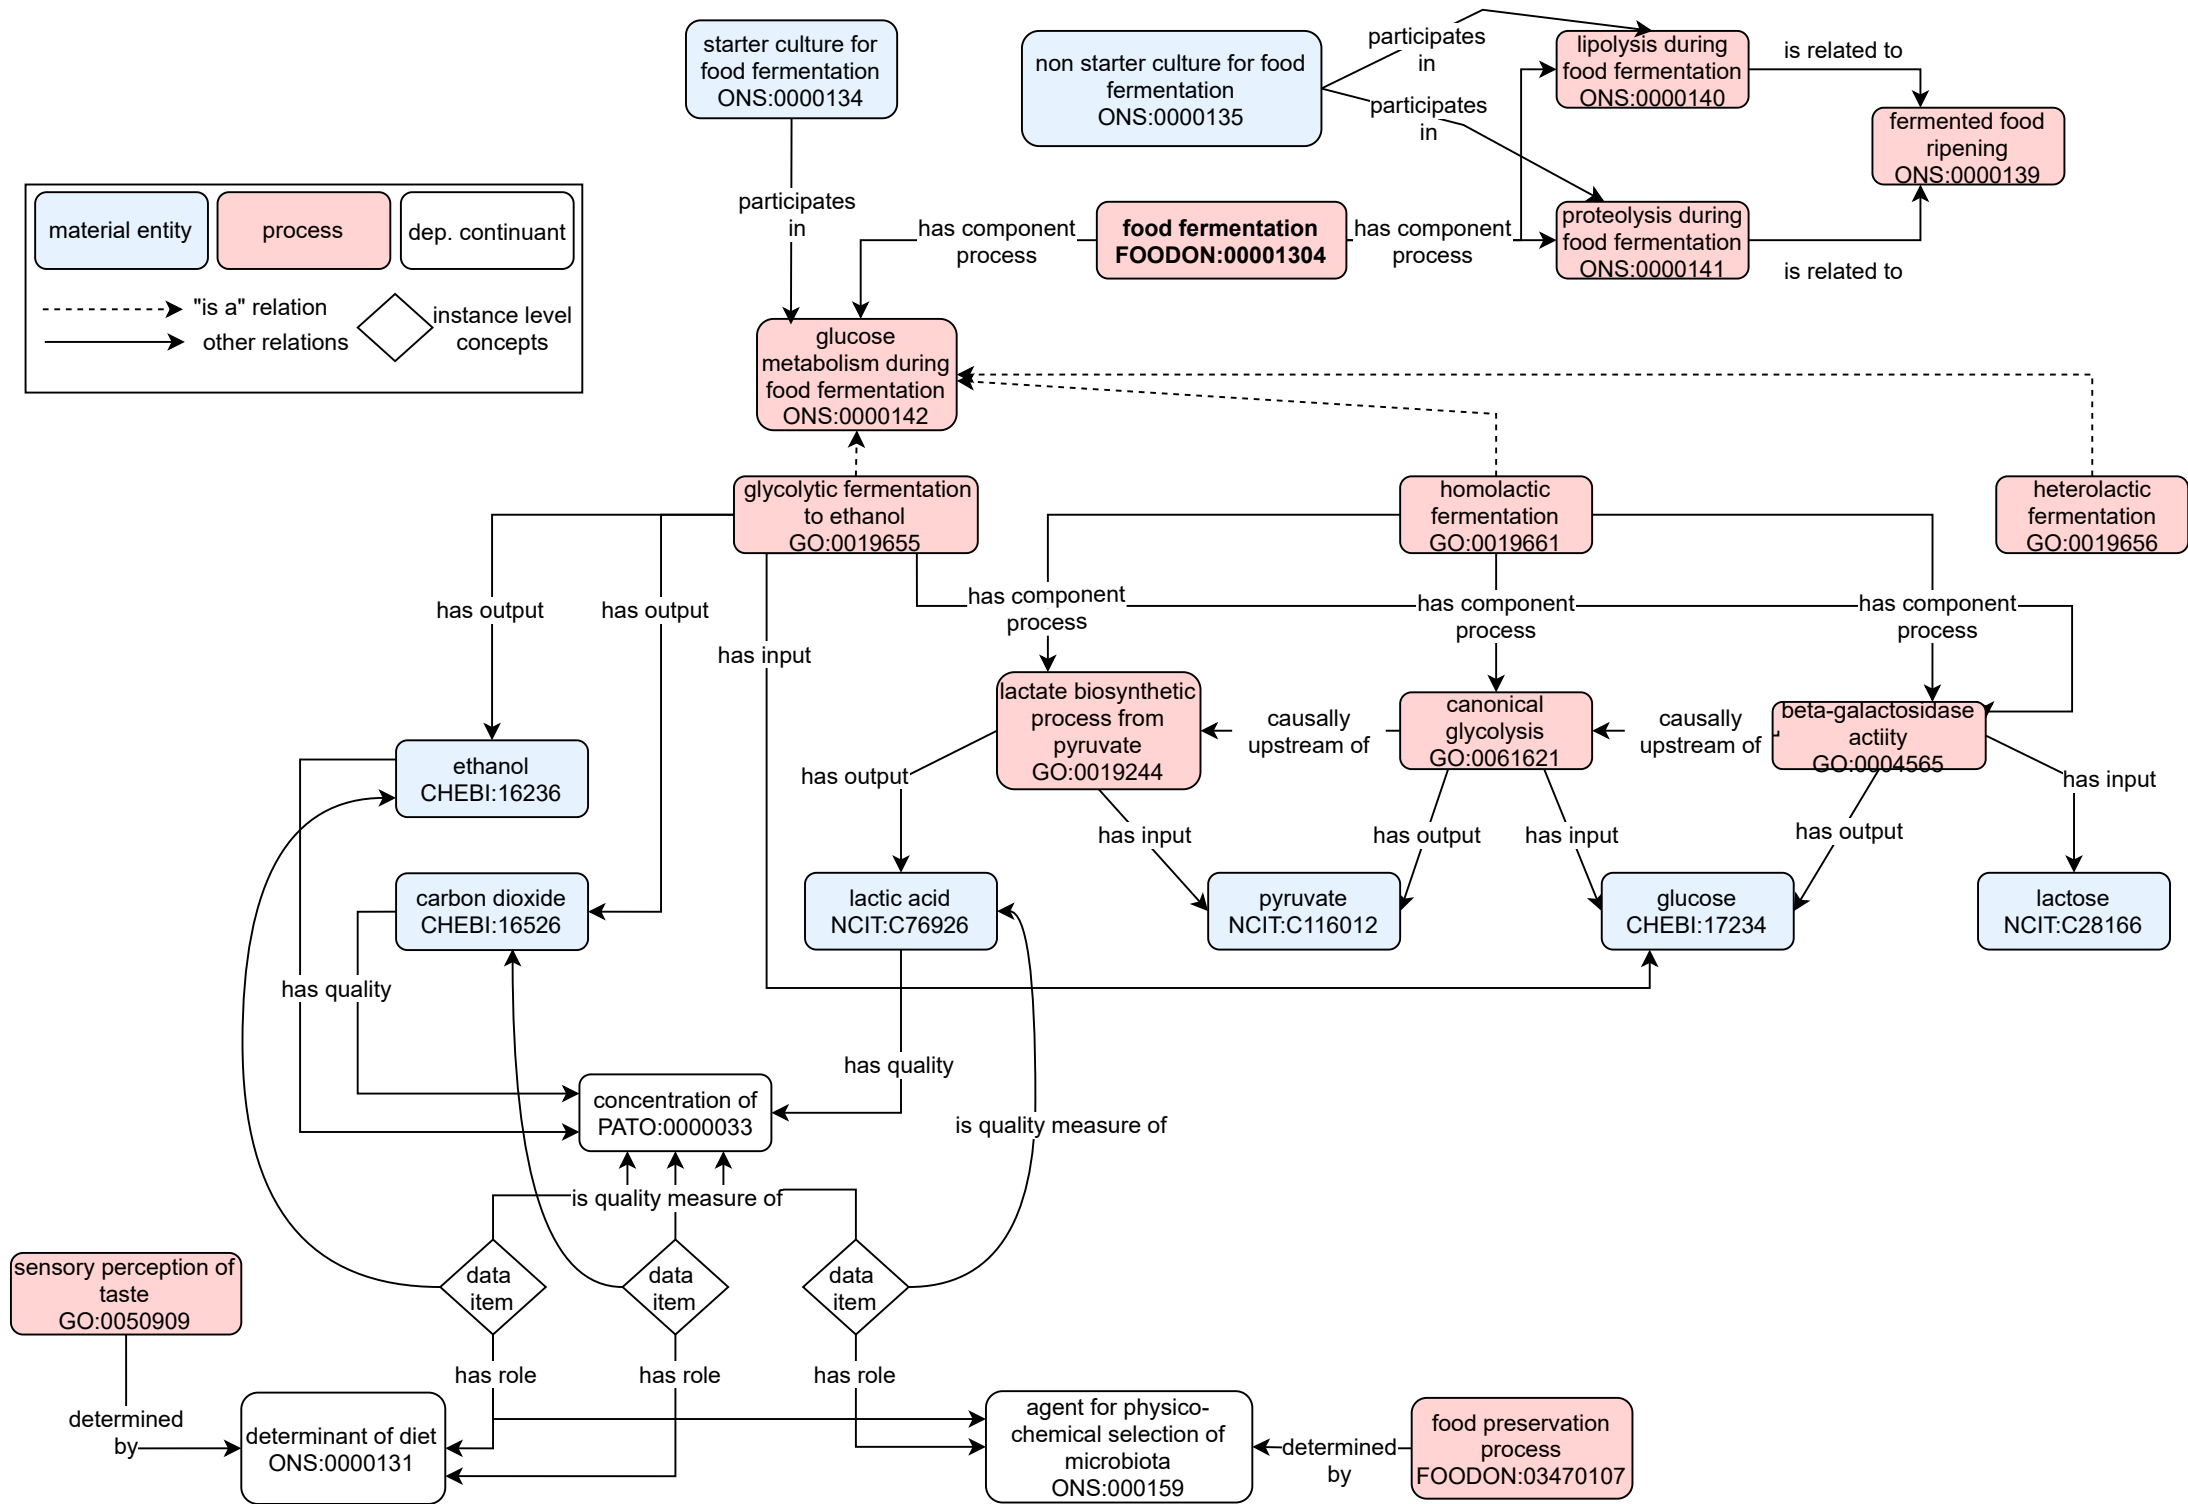

Supplement: s1 [file s1]
